# Supplementary material
Source: PubMed Central journal article supplement (PMC3536169)
Supplement: JB.01477-12_zjb999092353so1.pdf [file JB.01477-12_zjb999092353so1.pdf]

## Supplementary Information for

### Identification of Transport Proteins Involved in Free Fatty Acid Efflux in *Escherichia coli*

Rebecca M. Lennen<sup>1,2\*</sup>, Mark G. Politz<sup>1,2</sup>, Max A. Kruziki<sup>1</sup>, Brian F. Pflieger<sup>1,2‡</sup>

<sup>1</sup> Department of Chemical and Biological Engineering  
University of Wisconsin-Madison  
1415 Engineering Drive  
Madison, WI 53706

<sup>2</sup> U. S. Department of Energy Great Lakes Bioenergy Research Center  
University of Wisconsin-Madison  
1550 Linden Drive  
Madison, WI 53706

‡ Corresponding author:

Brian F. Pflieger  
University of Wisconsin-Madison  
Department of Chemical and Biological Engineering  
3629 Engineering Hall  
1415 Engineering Drive  
Madison, WI 53706-1691  
phone: (608) 890-1940  
fax: (608) 262-5434  
[pfleger@engr.wisc.edu](mailto:pfleger@engr.wisc.edu)

\* Current address:

Novo Nordisk Foundation Center for Biosustainability  
Technical University of Denmark  
Fremtidsvej 3  
2970 Hørsholm  
Denmark

## Table of Contents

|                                                                                                                                                         |    |
|---------------------------------------------------------------------------------------------------------------------------------------------------------|----|
| <b>Table S1:</b> List of oligonucleotide primers used in this study .....                                                                               | 3  |
| <b>Table S2:</b> Full list of bacterial strains and plasmids used in this study .....                                                                   | 5  |
| <b>Figure S1:</b> Determination of threshold for non-intact SYTOX Green stained cells from.....<br>green fluorescence histograms.                       | 9  |
| <b>Figure S2:</b> Scatter plots of normalized CFUs versus percent intact cells by SYTOX.....<br>Green staining.                                         | 10 |
| <b>Supplementary Results 1:</b> MIC of exogenous FFAs in single gene/operon deletion.....<br>strains                                                    | 11 |
| <b>Figure S3:</b> MIC assay for octanoate and decanoate against TY05 and selected single.....<br>deletions in TY05.                                     | 13 |
| <b>Figure S4:</b> Total fatty acid titers in TY05 deletion strains after 8 h.....                                                                       | 14 |
| <b>Figure S5:</b> Plate reader growth curves of <i>acrAB emrAB</i> double deletion strains and.....<br>negative control strains.                        | 15 |
| <b>Figure S6:</b> Total fatty acid titers for double efflux pump deletions in TY05 and TY06.....                                                        | 16 |
| <b>Supplementary Results 2:</b> Functional validation of drug efflux pump expression constructs....                                                     | 17 |
| <b>Figure S7:</b> MIC assay for SDS against TY05 $\Delta$ <i>acrAB</i> expressing selected efflux pump.....<br>system components on multicopy plasmids. | 19 |
| <b>Figure S8:</b> Analysis of <i>E. coli</i> TY05ara expressing selected efflux pumps on multicopy.....<br>plasmids                                     | 20 |

**Table S1:** List of oligonucleotide primers used in this study.

| Primer name <sup>a</sup> | Sequence (5' to 3') <sup>b</sup>                                  |
|--------------------------|-------------------------------------------------------------------|
| 1 fadD_colPCR_fwd        | ACGGCATGTATATCATTTGGG                                             |
| 2 fadD_colPCR_rev        | CTTTAGTGGGCGTCAAAAAAAC                                            |
| 3 araBAD_colPCR_fwd      | AAGCGGGACCAAAGCCATGAC                                             |
| 4 araBAD_colPCR_rev      | AGGAGACTTCTGTCCCTTGCG                                             |
| 5 araFGH_colPCR_fwd      | GGTACCAAAGACAACAAGGATTTCC                                         |
| 6 araFGH_colPCR_rev      | CTATACTTACATGTCTGTAAAGCGCG                                        |
| 7 ParaE_colPCR_fwd       | CATGGCGACCAACAATACTC                                              |
| 8 ParaE_colPCR_rev       | TTCCGCCTCAATATGACG                                                |
| 9 fadE_colPCR_fwd        | CGATTGATGGTAAAACGGTGTGT                                           |
| 10 fadE_colPCR_rev       | CTGAAGTGCGGATAAAAACAGCAA                                          |
| 11 fadAB_colPCR_fwd      | GGAGTGAATAAGTAACGCATCC                                            |
| 12 fadAB_colPCR_rev      | GCTGTCGCGTCTTATCGTGC                                              |
| 13 acrAB_KO_fwd          | ACCATTGACCAATTTGAAATCGGACACTCGAGGTTTACATGTGT<br>AGGCTGGAGCTGCTTC  |
| 14 acrAB_KO_rev          | CCGCTTACGCGGCCTTAGTGATTACACGTTGTATCAATTCGGG<br>GATCCGTCGACC       |
| 15 mdtEF_KO_fwd          | TTAAAGAACC GTTATTTCTCAAGAATTTTCAGGGACTAAAGTGT<br>AGGCTGGAGCTGCTTC |
| 16 mdtEF_KO_rev          | CTGAACCTTCATGTTCAACCTTACTCTCATTTACACGTTAATTC<br>CGGGGATCCGTCGACC  |
| 17 acrEF_KO_fwd          | TTGGGTAAATAACGCGCTTTTGGTTTTTTTGAGGAATAGTAGTGT<br>AGGCTGGAGCTGCTTC |
| 18 acrEF_KO_rev          | ATATAAAGGCACCCGAAAGCGCCTTTATGTTTTCTGATTTAATTC<br>CGGGGATCCGTCGACC |
| 19 emrAB_KO_fwd          | TCGGCTCAGCCGATGAGTTAAGAAGATCGTGGAGAACAATGTGT<br>AGGCTGGAGCTGCTTC  |
| 20 emrAB_KO_rev          | TGAACTGGCTTAGTTGTACTTAGTGCGCACCGCCTCCGCCATTC<br>CGGGGATCCGTCGACC  |
| 21 mdtABCD_KO_fwd        | ATTCCGCGAAACGTTTCAGGAAGAGAACTCTTAACGATGGTGT<br>AGGCTGGAGCTGCTTC   |
| 22 mdtABCD_KO_rev        | GTAATACCGGGTCGCCAGAACTTCATTGCGCGCTCCTTTTATTC<br>CGGGGATCCGTCGACC  |
| 23 rob_colPCR_fwd        | GTCAAGCCCTAAAACATACTCTAC                                          |
| 24 rob_colPCR_rev        | GATGCCTGGTGAGTACGATTC                                             |
| 25 tolC_colPCR_fwd       | ACGCCAACCTTTTGCGGTAG                                              |
| 26 tolC_colPCR_rev       | GAAGAATGCGGCAGATAACC                                              |
| 27 fadL_colPCR_fwd       | GCCACTGGTCTGATTTCTAAG                                             |
| 28 fadL_colPCR_rev       | CAAACTCAGGAGGTAAGCAATG                                            |
| 29 prc_colPCR_fwd        | AGTCTGGATAGTGCGTAAGTC                                             |
| 30 prc_colPCR_rev        | GCTGAATTCGGGTATGTCTTTG                                            |

**Table S1 (cont.)**

| Primer name <sup>a</sup> | Sequence (5' to 3') <sup>b</sup>                             |
|--------------------------|--------------------------------------------------------------|
| 31 acrD_colPCR_fwd       | TCGTACCTTGCCGCTACAGTG                                        |
| 32 acrD_colPCR_rev       | CAAAGTACAAACAGCAAGAACCCG                                     |
| 33 mdtG_colPCR_fwd       | GATAAAAGCTCTCTGGATTGCG                                       |
| 34 mdtG_colPCR_rev       | GCAGCGTCAATGGCTTCTTC                                         |
| 35 mdtK_colPCR_fwd       | GAATGGCTATTTTTTCACTGGAG                                      |
| 36 mdtK_colPCR_rev       | GATAACAGATGCCAGTCGG                                          |
| 37 cmr_colPCR_fwd        | GTAGCTATACTCGTAATAATGTAAG                                    |
| 38 cmr_colPCR_rev        | CCTTATGTTCCGCATCTTGC                                         |
| 39 ompF_colPCR_fwd       | AGACACCAAACCTCTCATCAATAGTTC                                  |
| 40 ompF_colPCR_rev       | AACGCAGGCTGTTTTTTCGCAAGAC                                    |
| 41 acrAB_colPCR_fwd      | CAGGCGTTAGATTTACATACATTTG                                    |
| 42 acrAB_colPCR_rev      | CCGTGGTTAATACTGGTTTTTCG                                      |
| 43 mdtEF_colPCR_fwd      | GTGCCTGTATCCCACCTTAC                                         |
| 44 mdtEF_colPCR_rev      | GATGACGAATGGCTGGAGTG                                         |
| 45 acrEF_colPCR_fwd      | CCCGCGTCAAATAAAACAGTAG                                       |
| 46 acrEF_colPCR_rev      | CGGAGGTTATAAATCTTGCGG                                        |
| 47 emrAB_colPCR_fwd      | CTCCCGTCTCGACCAGATGG                                         |
| 48 emrAB_colPCR_rev      | CTCGTTGCAGGAAGCGCAGG                                         |
| 49 mdtABCD_colPCR_fwd    | CATTCAGACGATTCAGACA                                          |
| 50 mdtABCD_colPCR_rev    | AGCCACGCTCAAAACTGATAC                                        |
| 51 pBAD33-C280*_fwd      | GGGCTCGAGTTAACCGGCACGGAACCTCGCTCG                            |
| 52 pBAD33-C280*_rev      | GGGCTCGAGTTGGTAACGAATCAGACAATTGACGGC                         |
| 53 acrAB_fwd             | TTTTCCCGGGCACTCGAGTTTACATATGAAC                              |
| 54 acrAB_rev             | CCCTCTAGATCAATGATGATCGACAGTATGG                              |
| 55 tolC_fwd              | GGGTCTAGATTACACCACAAGGAATGCAAATGAAGAAATTGCTCC<br>CCATTCTTATC |
| 56 tolC_rev              | GGGGCATGCTCAGTTACGGAAAGGGTTATGACC                            |
| 57 emrAB_fwd             | GCCCCGGGTCGTGGAGAACAATATGAGCGCAAATG                          |
| 58 emrAB_rev             | GGGTCTAGATTAGTGCGCACCGCCTCCG                                 |
| 59 mdtEF_fwd             | GGGGAGCTCAAGAATTTTCAGGGACTAAAA                               |
| 60 mdtEF_rev             | AAACCCGGGCATTTACACGTTACGCTTTTT                               |
| 61 mdtABCD_fwd           | AAAGAGCTCCAGGAAGAGAACTCTTAACGATG                             |
| 62 mdtABCD_rev           | AAACCCGGGACTTCATTGCGCGCTCCTTTT                               |

<sup>a</sup> Primers containing 'colPCR' were used colony PCR verification of chromosomal gene insertions and deletions. Primers containing restriction sites were used for amplification of insertions for cloning. Primers containing 'KO' were used for generating linear cassettes for homologous recombination in strain DY330.

<sup>b</sup> Restriction sites are underlined

**Table S2:** Full table of bacterial strains and plasmids used in this study.

| Strain      | Relevant genotype/property <sup>a</sup>                                                                                                                                   | Source or reference |
|-------------|---------------------------------------------------------------------------------------------------------------------------------------------------------------------------|---------------------|
| K-12 MG1655 | F <sup>-</sup> λ <sup>-</sup> <i>ilvG<sup>-</sup> rfb-50 rph-1</i>                                                                                                        | CGSC                |
| DH5α        | <i>fhuA2 Δ(argF-lacZ)U169 phoA glnV44 Φ80 Δ(lacZ)M15</i>                                                                                                                  | Invitrogen          |
| TY05        | <i>gyrA96 recA1 relA1 endA1 thi-1 hsdR17</i><br>K-12 MG1655 <i>fadD::P<sub>trc</sub>-BTE fadE::P<sub>trc</sub>-BTE</i>                                                    | (9)                 |
| TY06        | <i>fadAB::P<sub>trc</sub>-BTE</i><br>K-12 MG1655 <i>fadD::P<sub>trc</sub>-BTE-H204A fadE::P<sub>trc</sub>-BTE-</i><br><i>H204A fadAB::P<sub>trc</sub>-BTE-H204A</i>       | (9)                 |
| TY05ara     | K-12 MG1655 <i>fadD::P<sub>trc</sub>-BTE fadE::P<sub>trc</sub>-BTE</i><br><i>fadAB::P<sub>trc</sub>-BTE ΔaraFGH Φ(ΔaraEp P<sub>CP18</sub>-araE)</i><br><i>ΔaraBAD</i>     | This work           |
| BW25113     | <i>lacI<sup>q</sup> rrnB3 F- Δ(araD-araB)567 ΔlacZ4787(::rrnB-3) λ<sup>-</sup></i><br><i>rph-1 Δ(rhaD-rhaB)568 hsdR514</i>                                                | (1)                 |
| JW5249-1    | BW25113 <i>ΔmarA752::kan</i>                                                                                                                                              | (1)                 |
| JW4359-1    | BW25113 <i>Δrob-721::kan</i>                                                                                                                                              | (1)                 |
| JW4023-5    | BW25113 <i>ΔsoxS756::kan</i>                                                                                                                                              | (1)                 |
| JW5503-1    | BW25113 <i>ΔtolC732::kan</i>                                                                                                                                              | (1)                 |
| JW2341-1    | BW25113 <i>ΔfadL752::kan</i>                                                                                                                                              | (1)                 |
| JW1819-1    | BW25113 <i>Δprc-755::kan</i>                                                                                                                                              | (1)                 |
| JW2454-1    | BW25113 <i>ΔacrD790::kan</i>                                                                                                                                              | (1)                 |
| JW1040-1    | BW25113 <i>ΔmdtG723::kan</i>                                                                                                                                              | (1)                 |
| JW1655-1    | BW25113 <i>ΔmdtK740::kan</i>                                                                                                                                              | (1)                 |
| JW0826-1    | BW25113 <i>Δcmr-742::kan</i>                                                                                                                                              | (1)                 |
| JW0912-1    | BW25113 <i>ΔompF746::kan</i>                                                                                                                                              | (1)                 |
| DY330       | K-12 W3110 <i>ΔlacU169 gal490 pglΔ8 λcI857 Δ(cro-bioA)</i><br>(Tet <sup>R</sup> )                                                                                         | (8)                 |
| BW27269     | BW25113 <i>araFGH::kan903</i>                                                                                                                                             | (4)                 |
| BW27270     | BW25113 <i>Φ(ΔaraEp kan P<sub>CP18</sub>-araE)</i>                                                                                                                        | (4)                 |
| RL36        | K-12 MG1655 <i>fadD::P<sub>trc</sub>-BTE fadE::P<sub>trc</sub>-BTE</i><br><i>fadAB::P<sub>trc</sub>-BTE araFGH::kan</i>                                                   | This work           |
| RL37        | K-12 MG1655 <i>fadD::P<sub>trc</sub>-BTE fadE::P<sub>trc</sub>-BTE</i><br><i>fadAB::P<sub>trc</sub>-BTE ΔaraFGH</i>                                                       | This work           |
| RL38        | K-12 MG1655 <i>fadD::P<sub>trc</sub>-BTE fadE::P<sub>trc</sub>-BTE</i><br><i>fadAB::P<sub>trc</sub>-BTE ΔaraFGH Φ(ΔaraEp kan P<sub>CP18</sub>-araE)</i>                   | This work           |
| RL39        | K-12 MG1655 <i>fadD::P<sub>trc</sub>-BTE fadE::P<sub>trc</sub>-BTE</i><br><i>fadAB::P<sub>trc</sub>-BTE ΔaraFGH Φ(ΔaraEp P<sub>CP18</sub>-araE)</i>                       | This work           |
| RL40        | K-12 MG1655 <i>fadD::P<sub>trc</sub>-BTE fadE::P<sub>trc</sub>-BTE</i><br><i>fadAB::P<sub>trc</sub>-BTE ΔaraFGH Φ(ΔaraEp P<sub>CP18</sub>-araE)</i><br><i>araBAD::cat</i> | This work           |

**Table S2 (cont.)**

| <b>Strain</b> | <b>Relevant genotype/property<sup>a</sup></b> | <b>Source or reference</b> |
|---------------|-----------------------------------------------|----------------------------|
| RL46          | DY330 <i>acrAB::kan</i>                       | This work                  |
| RL47          | DY330 <i>mdtEF::kan</i>                       | This work                  |
| RL48          | DY330 <i>acrEF::kan</i>                       | This work                  |
| RL49          | DY330 <i>emrAB::kan</i>                       | This work                  |
| RL50          | DY330 <i>mdtABCD::kan</i>                     | This work                  |
| RL51          | TY05 <i>marA::kan</i>                         | This work                  |
| RL52          | TY06 <i>marA::kan</i>                         | This work                  |
| RL53          | TY05 <i>rob::kan</i>                          | This work                  |
| RL54          | TY06 <i>rob::kan</i>                          | This work                  |
| RL55          | TY05 <i>soxS::kan</i>                         | This work                  |
| RL56          | TY06 <i>soxS::kan</i>                         | This work                  |
| RL57          | TY05 <i>tolC::kan</i>                         | This work                  |
| RL58          | TY06 <i>tolC::kan</i>                         | This work                  |
| RL59          | TY05 <i>fadL::kan</i>                         | This work                  |
| RL60          | TY06 <i>fadL::kan</i>                         | This work                  |
| RL61          | TY05 <i>prc::kan</i>                          | This work                  |
| RL62          | TY06 <i>prc::kan</i>                          | This work                  |
| RL63          | TY05 <i>acrD::kan</i>                         | This work                  |
| RL64          | TY06 <i>acrD::kan</i>                         | This work                  |
| RL65          | TY05 <i>mdtG::kan</i>                         | This work                  |
| RL66          | TY06 <i>mdtG::kan</i>                         | This work                  |
| RL67          | TY05 <i>mdtK::kan</i>                         | This work                  |
| RL68          | TY06 <i>mdtK::kan</i>                         | This work                  |
| RL69          | TY05 <i>cmr::kan</i>                          | This work                  |
| RL70          | TY06 <i>cmr::kan</i>                          | This work                  |
| RL71          | TY05 <i>ompF::kan</i>                         | This work                  |
| RL72          | TY06 <i>ompF::kan</i>                         | This work                  |
| RL73          | TY05 <i>acrAB::kan</i>                        | This work                  |
| RL74          | TY06 <i>acrAB::kan</i>                        | This work                  |
| RL75          | TY05 <i>mdtEF::kan</i>                        | This work                  |
| RL76          | TY06 <i>mdtEF::kan</i>                        | This work                  |
| RL77          | TY05 <i>acrEF::kan</i>                        | This work                  |
| RL78          | TY06 <i>acrEF::kan</i>                        | This work                  |
| RL79          | TY05 <i>emrAB::kan</i>                        | This work                  |
| RL80          | TY06 <i>emrAB::kan</i>                        | This work                  |
| RL81          | TY05 <i>mdtABCD::kan</i>                      | This work                  |
| RL82          | TY06 <i>mdtABCD::kan</i>                      | This work                  |
| RL83          | TY05 $\Delta marA$                            | This work                  |
| RL84          | TY06 $\Delta marA$                            | This work                  |
| RL85          | TY05 $\Delta rob$                             | This work                  |
| RL86          | TY06 $\Delta rob$                             | This work                  |

**Table S2 (cont.)**

| <b>Strain</b> | <b>Relevant genotype/property<sup>a</sup></b>    | <b>Source or reference</b> |
|---------------|--------------------------------------------------|----------------------------|
| RL87          | TY05 $\Delta$ <i>soxS</i>                        | This work                  |
| RL88          | TY06 $\Delta$ <i>soxS</i>                        | This work                  |
| RL89          | TY05 $\Delta$ <i>tolC</i>                        | This work                  |
| RL90          | TY06 $\Delta$ <i>tolC</i>                        | This work                  |
| RL91          | TY05 $\Delta$ <i>fadL</i>                        | This work                  |
| RL92          | TY06 $\Delta$ <i>fadL</i>                        | This work                  |
| RL93          | TY05 $\Delta$ <i>prc</i>                         | This work                  |
| RL94          | TY06 $\Delta$ <i>prc</i>                         | This work                  |
| RL95          | TY05 $\Delta$ <i>acrD</i>                        | This work                  |
| RL96          | TY06 $\Delta$ <i>acrD</i>                        | This work                  |
| RL97          | TY05 $\Delta$ <i>mdtG</i>                        | This work                  |
| RL98          | TY06 $\Delta$ <i>mdtG</i>                        | This work                  |
| RL99          | TY05 $\Delta$ <i>mdtK</i>                        | This work                  |
| RL100         | TY06 $\Delta$ <i>mdtK</i>                        | This work                  |
| RL101         | TY05 $\Delta$ <i>cmr</i>                         | This work                  |
| RL102         | TY06 $\Delta$ <i>cmr</i>                         | This work                  |
| RL103         | TY05 $\Delta$ <i>ompF</i>                        | This work                  |
| RL104         | TY06 $\Delta$ <i>ompF</i>                        | This work                  |
| RL105         | TY05 $\Delta$ <i>acrAB</i>                       | This work                  |
| RL106         | TY06 $\Delta$ <i>acrAB</i>                       | This work                  |
| RL107         | TY05 $\Delta$ <i>mdtEF</i>                       | This work                  |
| RL108         | TY06 $\Delta$ <i>mdtEF</i>                       | This work                  |
| RL109         | TY05 $\Delta$ <i>acrEF</i>                       | This work                  |
| RL110         | TY06 $\Delta$ <i>acrEF</i>                       | This work                  |
| RL111         | TY05 $\Delta$ <i>emrAB</i>                       | This work                  |
| RL112         | TY06 $\Delta$ <i>emrAB</i>                       | This work                  |
| RL113         | TY05 $\Delta$ <i>mdtABCD</i>                     | This work                  |
| RL114         | TY06 $\Delta$ <i>mdtABCD</i>                     | This work                  |
| RL115         | TY05 $\Delta$ <i>acrAB</i> <i>acrD::kan</i>      | This work                  |
| RL116         | TY06 $\Delta$ <i>acrAB</i> <i>acrD::kan</i>      | This work                  |
| RL117         | TY05 $\Delta$ <i>acrAB</i> <i>mdtEF::kan</i>     | This work                  |
| RL118         | TY06 $\Delta$ <i>acrAB</i> <i>mdtEF::kan</i>     | This work                  |
| RL119         | TY05 $\Delta$ <i>acrAB</i> <i>acrEF::kan</i>     | This work                  |
| RL120         | TY06 $\Delta$ <i>acrAB</i> <i>acrEF::kan</i>     | This work                  |
| RL121         | TY05 $\Delta$ <i>acrAB</i> <i>emrAB::kan</i>     | This work                  |
| RL122         | TY06 $\Delta$ <i>acrAB</i> <i>emrAB::kan</i>     | This work                  |
| RL123         | TY05 $\Delta$ <i>acrAB</i> <i>mdtABCD::kan</i>   | This work                  |
| RL124         | TY06 $\Delta$ <i>acrAB</i> <i>mdtABCD::kan</i>   | This work                  |
| RL125         | TY05 $\Delta$ <i>acrAB</i> $\Delta$ <i>acrD</i>  | This work                  |
| RL126         | TY06 $\Delta$ <i>acrAB</i> $\Delta$ <i>acrD</i>  | This work                  |
| RL127         | TY05 $\Delta$ <i>acrAB</i> $\Delta$ <i>mdtEF</i> | This work                  |

**Table S2 (cont.)**

| <b>Strain</b>                 | <b>Relevant genotype/property<sup>a</sup></b>                                                                                                                                            | <b>Source or reference</b> |
|-------------------------------|------------------------------------------------------------------------------------------------------------------------------------------------------------------------------------------|----------------------------|
| RL128                         | TY06 $\Delta$ <i>acrAB</i> $\Delta$ <i>mdtEF</i>                                                                                                                                         | This work                  |
| RL129                         | TY05 $\Delta$ <i>acrAB</i> $\Delta$ <i>acrEF</i>                                                                                                                                         | This work                  |
| RL130                         | TY06 $\Delta$ <i>acrAB</i> $\Delta$ <i>acrEF</i>                                                                                                                                         | This work                  |
| RL131                         | TY05 $\Delta$ <i>acrAB</i> $\Delta$ <i>emrAB</i>                                                                                                                                         | This work                  |
| RL132                         | TY06 $\Delta$ <i>acrAB</i> $\Delta$ <i>emrAB</i>                                                                                                                                         | This work                  |
| RL133                         | TY05 $\Delta$ <i>acrAB</i> $\Delta$ <i>mdtABCD</i>                                                                                                                                       | This work                  |
| RL134                         | TY06 $\Delta$ <i>acrAB</i> $\Delta$ <i>mdtABCD</i>                                                                                                                                       | This work                  |
| RL135                         | TY05ara <i>acrAB::kan</i>                                                                                                                                                                | This work                  |
| <b>Plasmids</b>               |                                                                                                                                                                                          |                            |
| pKD13                         | Template plasmid, R6K gamma origin, Amp <sup>R</sup> , Kan <sup>R</sup>                                                                                                                  | (2)                        |
| pCP20                         | carries yeast FLP recombinase under constitutive promoter, pSC101 origin, $\lambda$ cI857 <sup>+</sup> , $\lambda$ p <sub>R</sub> Rep <sup>ts</sup> , Amp <sup>R</sup> , Cm <sup>R</sup> | (2)                        |
| pBAD33                        | P <sub>BAD</sub> promoter, pACYC origin, Cm <sup>R</sup>                                                                                                                                 | (3)                        |
| pBAD33-C280*                  | pBAD33 with <i>araC</i> -C280* mutation                                                                                                                                                  | This work                  |
| pBAD33-C280*-<br>tolC         | pBAD33-C280* carrying <i>tolC</i> under P <sub>BAD</sub> control, Cm <sup>R</sup>                                                                                                        | This work                  |
| pBAD33-C280*-<br>acrAB        | pBAD33-C280* carrying <i>acrAB</i> under P <sub>BAD</sub> control, Cm <sup>R</sup>                                                                                                       | This work                  |
| pBAD33-C280*-<br>acrAB-tolC   | pBAD33-C280* carrying <i>acrAB-tolC</i> artificial operon under P <sub>BAD</sub> control, Cm <sup>R</sup>                                                                                | This work                  |
| pBAD33-C280*-<br>mdtEF        | pBAD33-C280* carrying <i>mdtEF</i> under P <sub>BAD</sub> control, Cm <sup>R</sup>                                                                                                       | This work                  |
| pBAD33-C280*-<br>mdtEF-tolC   | pBAD33-C280* carrying <i>mdtEF-tolC</i> artificial operon under P <sub>BAD</sub> control, Cm <sup>R</sup>                                                                                | This work                  |
| pBAD33-C280*-<br>emrAB        | pBAD33-C280* carrying <i>emrAB</i> under P <sub>BAD</sub> control, Cm <sup>R</sup>                                                                                                       | This work                  |
| pBAD33-C280*-<br>emrAB-tolC   | pBAD33-C280* carrying <i>emrAB-tolC</i> artificial operon under P <sub>BAD</sub> control, Cm <sup>R</sup>                                                                                | This work                  |
| pBAD33-C280*-<br>mdtABCD      | pBAD33-C280* carrying <i>mdtABCD</i> under P <sub>BAD</sub> control, Cm <sup>R</sup>                                                                                                     | This work                  |
| pBAD33-C280*-<br>mdtABCD-tolC | pBAD33-C280* carrying <i>mdtABCD-tolC</i> artificial operon under P <sub>BAD</sub> control, Cm <sup>R</sup>                                                                              | This work                  |

<sup>a</sup>Abbreviations: Amp, ampicillin; Cm, chloramphenicol; Kan, kanamycin; R, resistance; ts, temperature sensitive.



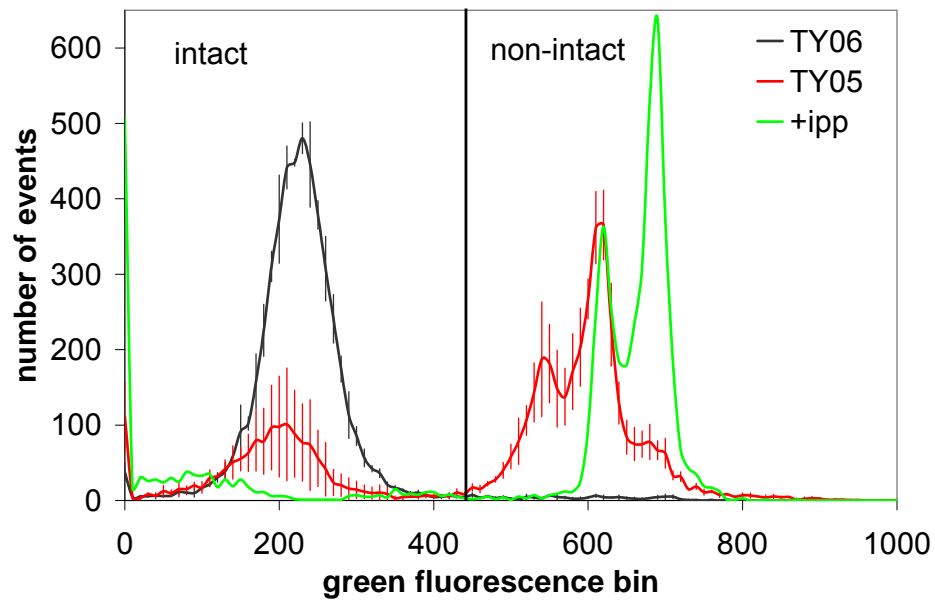

**Figure S1: Determination of threshold for non-intact SYTOX Green stained cells from green fluorescence histograms.** Induced cultures of TY06 and TY05 were stained after 8 h growth, and a TY05 strain (TY05/pBAD33\*) was additionally treated with 25% v/v isopropanol (ipp, green curve) for 10 minutes, to demonstrate justification of a green fluorescence value of 440 as the threshold between intact and non-intact cells. Error bars represent standard deviations in each histogram bin from three biological replicate cultures.

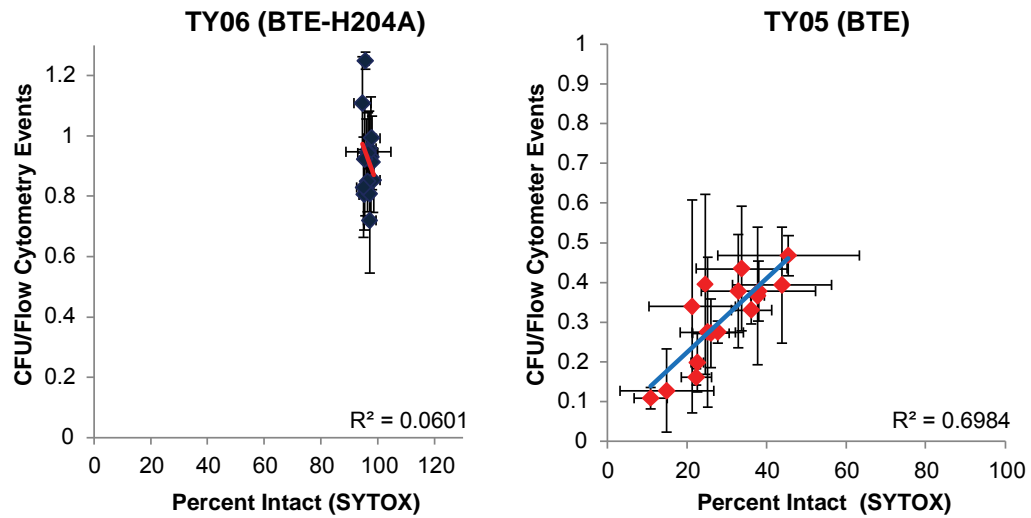

**Figure S2: Scatter plots of normalized CFUs versus percent intact cells by SYTOX Green staining.** (Left) TY06 background strain data points with linear fit having  $R^2$  value of 0.0601. (Right) TY05 background strain data points with linear fit having  $R^2$  value of 0.6984.

### Supplementary Results 1: MIC of exogenous FFAs in single gene/operon deletion strains

To further confirm the role of the identified genes in conferring resistance to free fatty acids, deletion strains in TY05 were plated under non-inducing conditions (no added IPTG) on LB agar containing varying concentrations of octanoic and decanoic acid. The pH was adjusted to 7 in all plates by addition of equimolar amounts of NaOH, and it was confirmed that the maximum concentration of Na<sup>+</sup> present was not growth inhibitory toward TY05 or TY05  $\Delta$ *acrAB* in a plate containing NaCl (data not shown). Dodecanoic and tetradecanoic acids were non-inhibitory at plate concentrations of 2 g/L, which was also above their solubility limits. We have previously observed minimal toxicity of 0.5 g/L dodecanoic acid added to cultures and have postulated that endogenously produced dodecanoic acid, or the mixture of fatty acids resulting from expression of BTE, exhibits a higher degree of toxicity (5). In contrast, sodium octanoate and decanoate appear soluble at concentrations of up to 10 g/L and 5 g/L, respectively, and both elicit growth inhibition in strain TY05 at concentrations below these apparent solubilities. Saturated overnight cultures of TY05, TY05  $\Delta$ *acrAB*, TY05  $\Delta$ *emrAB*, TY05  $\Delta$ *mdtEF*, TY05  $\Delta$ *mdtABCD*, TY05  $\Delta$ *tolC*, and TY05  $\Delta$ *rob* were diluted 1:100 in 5 mL of LB agar in glass tubes and incubated at 37°C for 4 h with 250 rpm shaking. At this time, all cultures had an OD<sub>600</sub> between 2.5 to 2.9. Samples from each culture were serially diluted in PBS and 3  $\mu$ L of 10<sup>4</sup>, 10<sup>5</sup>, and 10<sup>6</sup>-fold dilutions were spotted on plates containing varying concentrations of octanoate and decanoate (**Figure S3**). After overnight incubation at 37°C, growth of TY05 was observed up to 5 g/L octanoate and 4 g/L decanoate. Growth was observed for TY05  $\Delta$ *acrAB* only for 0 g/L decanoate (no growth at 0.5 g/L) and up to 3 g/L octanoate, while TY05  $\Delta$ *rob* grew on up to 3 g/L decanoate and 4 g/L octanoate. Growth was observed of TY05  $\Delta$ *mdtABCD* up to 4 g/L decanoate (same as TY05) but only up to 4 g/L octanoate. TY05  $\Delta$ *tolC* was the most inhibited,

showing greatly reduced growth on plates containing 0 g/L octanoate and no growth on 0 g/L decanoate, despite the similar OD<sub>600</sub> to all other strains grown in liquid LB medium. Presumably, the presence of either Brij-35 or ethanol was responsible for the inhibition of growth on plates. However, while some growth was observed for TY05  $\Delta tolC$  on 0 g/L octanoate, no growth was observed for 1 g/L or any higher concentration, indicative of a fatty acid-specific effect. All other strains tested had similar MICs toward octanoate and decanoate as background strain TY05.

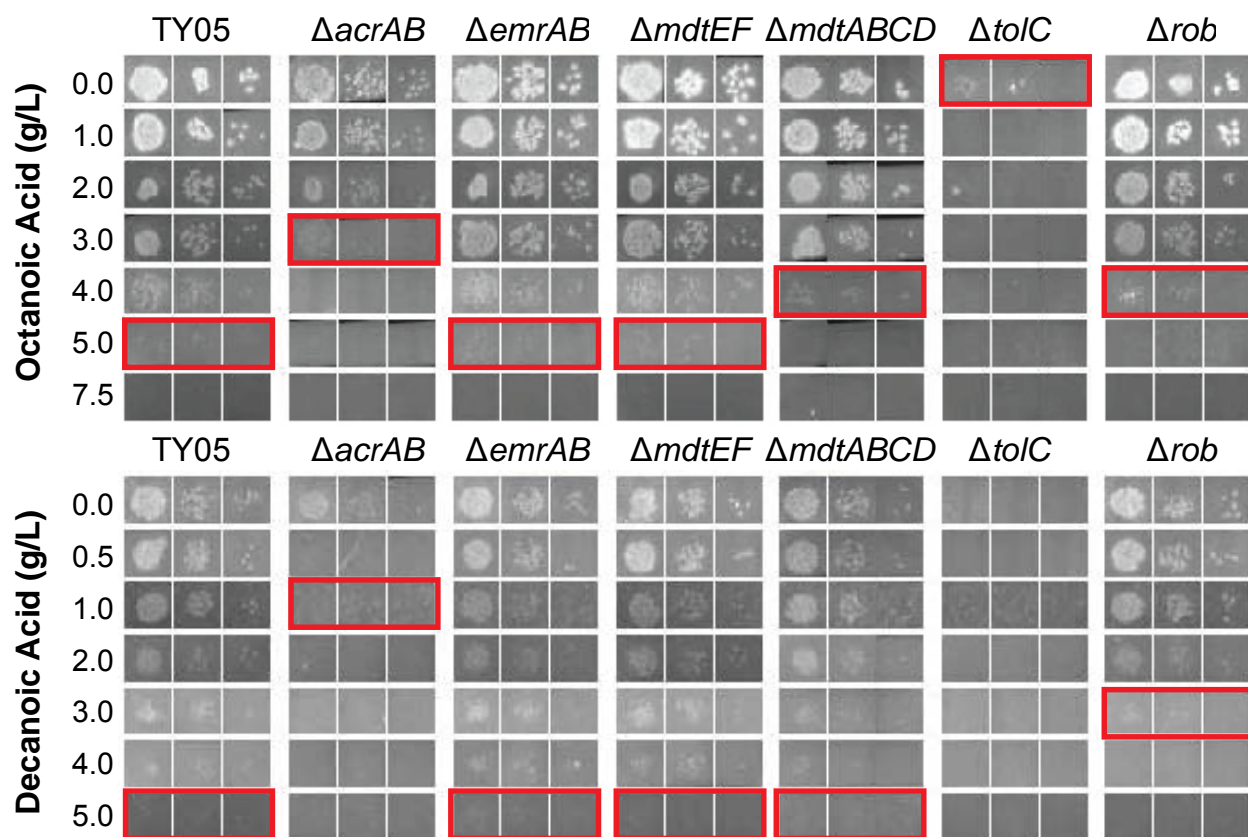

**Figure S3: MIC assay for octanoate and decanoate against TY05 and selected single deletions in TY05.** (top) TY05 exhibits visible growth up to 5 g/L octanoate. Deletions in *acrAB*, *rob*, *mdtABCD*, and *tolC* resulted in reduced MICs of 3, 4, 4, and 0 g/L octanoate, respectively. (bottom) TY05 exhibits visible growth up to 4 g/L decanoate. Deletions in *acrAB*, *rob*, and *tolC* resulted in reduced MICs of 0.5, 3 g/L decanoate, and no growth, respectively. Red boxes denote the maximum concentration at which growth was observed after incubation for one night at 37°C and several more days at room temperature.

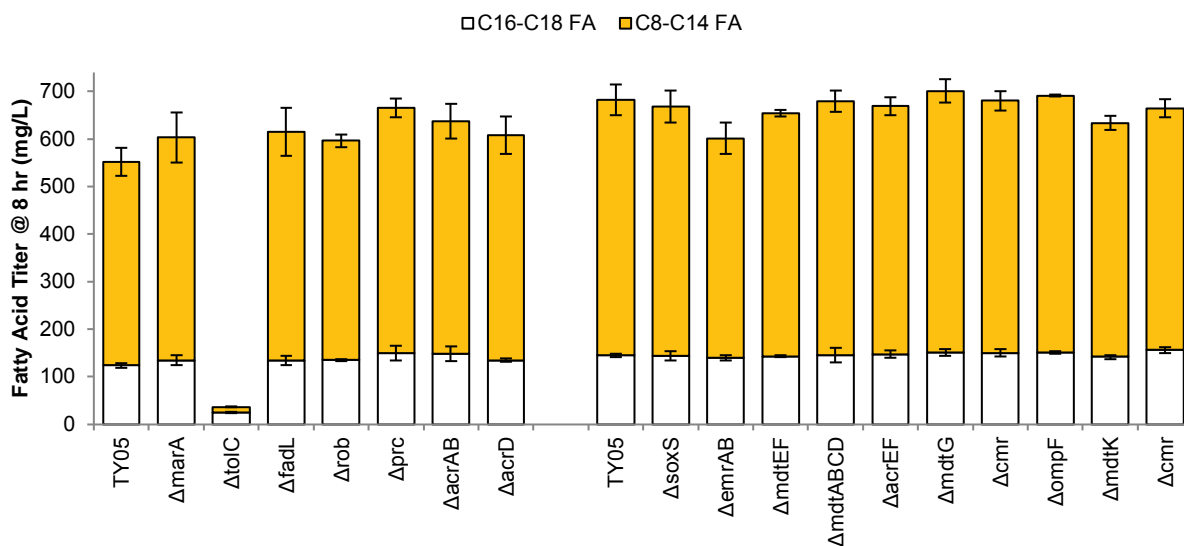

**Figure S4: Total fatty acid titers in TY05 deletion strains after 8 h.** Fatty acids were extracted from TY05 cultures grown for 8 h in LB + 0.4% glycerol in two separate experiments (the results of TY05 are shown for each experiment). In general no significant differences were observed except for TY05 *ΔtolC*.

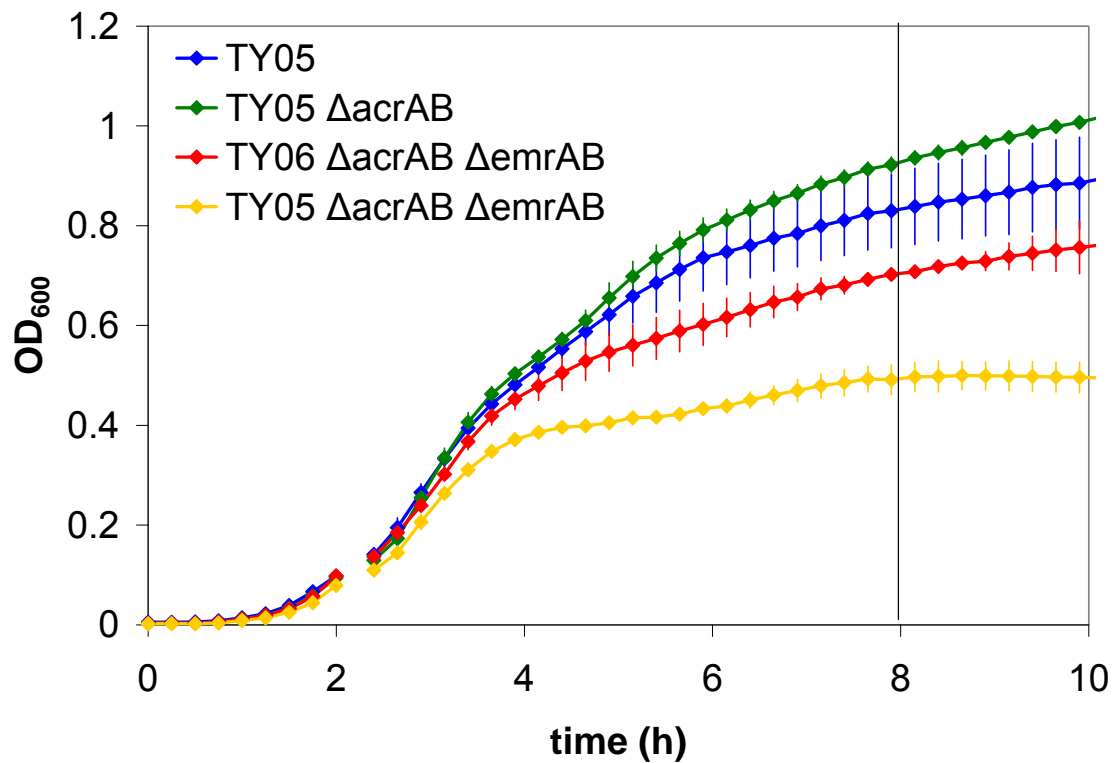

**Figure S5: Plate reader growth curves of *acrAB emrAB* double deletion strains and negative control strains.** Biological triplicate cultures were grown in 96-well plates in LB + 0.4% glycerol with shaking at 37°C and induced after 2 h with 1 mM IPTG. TY05  $\Delta$ *acrAB*  $\Delta$ *emrAB* exhibited a reduced OD<sub>600</sub> at 8 h (marked with vertical line), the sampling time at which CFU/mL and SYTOX Green staining was performed from shake flask cultures.

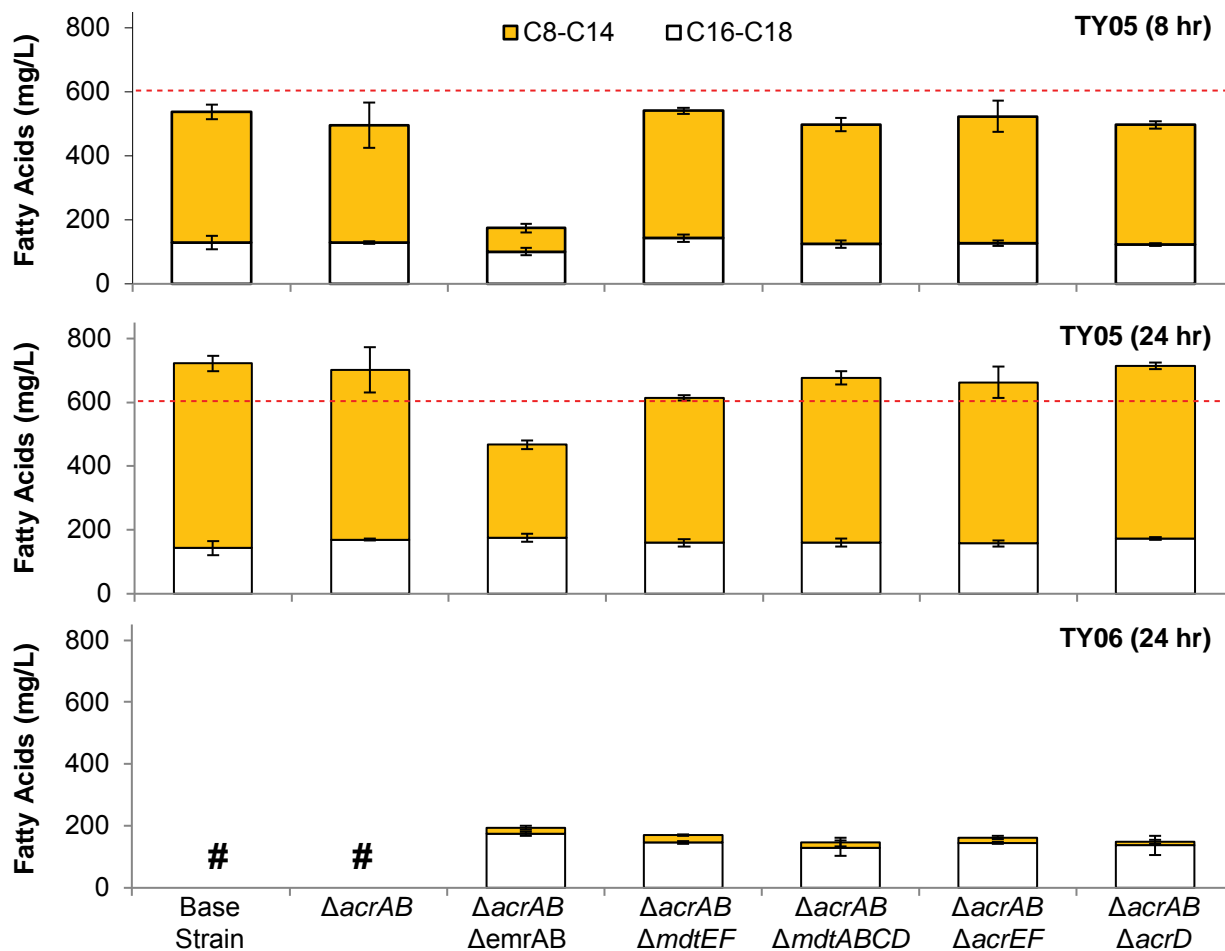

**Figure S6: Total fatty acid titers for double efflux pump deletions in TY05 and TY06.** Fatty acids were sampled 8 h and 24 h post-inoculation. TY05  $\Delta acrAB \Delta emrAB$  exhibits greatly reduced fatty acid production (primarily reduced C<sub>8</sub>-C<sub>14</sub>) relative to other TY05 strains after 8 h. Low titers relative to other TY05 strains persist in TY05  $\Delta acrAB \Delta emrAB$  after 24 h. # - not measured.



## Supplementary Results 2: Functional validation of drug efflux pump expression constructs

All identified gene/operon deletions that exhibited reduced viabilities encode for TolC-associated multidrug efflux pumps that have previously been shown to confer resistance to SDS (6, 7). While wild-type *E. coli* exhibited an MIC toward SDS of greater than 12.8 mg/mL, deletions in *acrAB* reduced the MIC to between 0.05 and 0.1 mg/mL (6, 7). Expression of *acrAB*, *emrAB*, *mdtEF*, and *mdtABCD* on high copy plasmids in an *acrAB* deletion strain increased the MIC toward SDS from 0.05 mg/mL to greater than 0.4 mg/mL, 0.1 mg/mL, 0.2 mg/mL, and 0.2 mg/mL, respectively (6). Therefore an increase in MIC of SDS was used to validate the functional expression of multidrug efflux pumps cloned into pBAD33\*. As previously observed, strain TY05 (with intact *acrAB*) harboring empty vector pBAD33\* exhibited no inhibition of growth on plates containing up to 50 mg/mL of SDS, beyond the aqueous solubility limit (data not shown). Also in accordance with prior literature, strain TY05  $\Delta$ *acrAB* harboring pBAD33\* exhibited an MIC of less than 0.1 mg/mL. Complementation of TY05  $\Delta$ *acrAB* with pBAD33\*-*acrAB* fully restored the MIC to greater than 50 mg/mL SDS (Figure S6). Complementation of TY05  $\Delta$ *acrAB* with pBAD33\*-*emrAB*, pBAD33\*-*mdtEF*, and pBAD33\*-*mdtABCD* restored the MIC to less than 0.1 mg/mL, 0.1 mg/mL, and 0.1 mg/mL after one night incubation at 37°C, respectively (**Figure S7**). After two nights of incubation at 37°C, the MICs were 0.1 mg/mL, between 0.1 to 0.5 mg/mL, and 0.1 mg/mL, respectively. Functional expression was therefore validated in all four constructs.

While resistance can be conferred without overexpression of *tolC*, encoding the outer membrane component of each drug efflux pump, it is not known whether additional expression of *tolC* can improve observed MICs and function of inner membrane and periplasmic efflux pump components expressed on multicopy plasmids. Thus each drug efflux pump was also

cloned in an artificial operon with *tolC* harboring its native ribosome binding site. Interestingly, TY05  $\Delta$ *acrAB* harboring pBAD33\**-acrAB-tolC* completely lost the resistance to SDS observed with pBAD33\**-acrAB*, with an MIC of less than 0.1 mg/mL despite robust growth in LB containing chloramphenicol and L-arabinose (Figure S6). However, pBAD33\**-emrAB-tolC* and pBAD33\**-mdtABCD-tolC* conferred equivalent MICs of SDS as the non-*tolC* containing plasmids. Only pBAD33\**-mdtEF-tolC* exhibited an improved MIC over pBAD33\**-mdtEF* alone, with MIC increasing from between 0.1 to 0.5 mg/mL to 1.0 mg/mL after two nights incubation at 37°C (**Figure S7**). As a result, pBAD33\**-mdtEF-tolC* was the only *tolC* expressing construct selected to go forward with FFA plate MIC assays and overexpression in endogenous FFA overproducing strains.

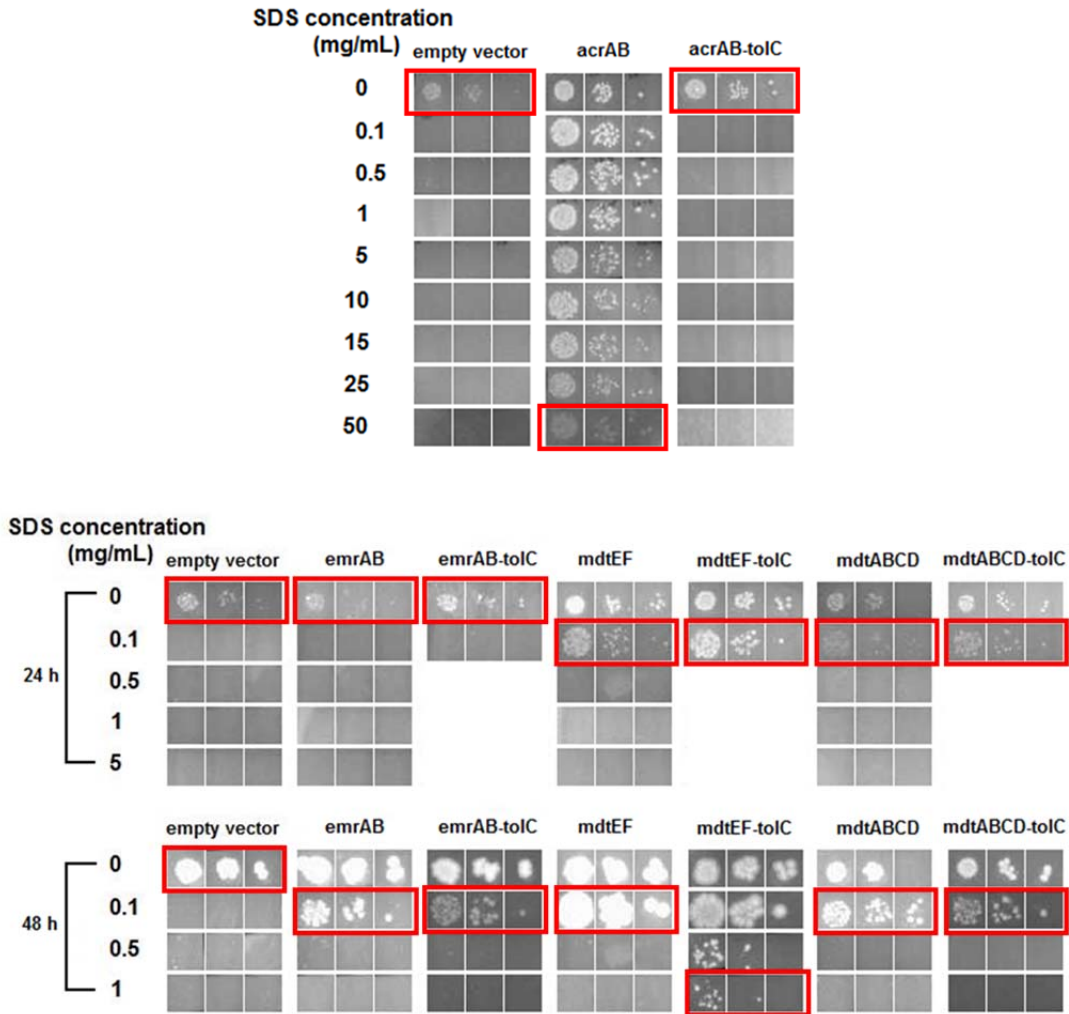

**Figure S7: MIC assay for SDS against TY05  $\Delta$ *acrAB* expressing selected efflux pump system components on multicopy plasmids.** TY05  $\Delta$ *acrAB* harbored empty vector as a negative control, or inner membrane/periplasmic linker components encoded in operons by themselves or in artificial operons with *tolC* expressed on a multicopy plasmid. (A) Expression of *acrAB* restores growth to TY05  $\Delta$ *acrAB* up to 50 mg/mL SDS, but expression of *acrAB-tolC* confers no resistance. (B) After 24 h, expression of *mdtEF*, *mdtEF-tolC*, *mdtABCD*, and *mdtABCD-tolC* confer resistance to 0.1 mg/mL SDS in TY05  $\Delta$ *acrAB*. After 48 h, growth is observed at 0.1 mg/mL for overexpression of *emrAB*, *emrAB-tolC*, *mdtEF*, *mdtABCD*, and *mdtABCD-tolC*, and up to 1 mg/mL for *mdtEF-tolC*.

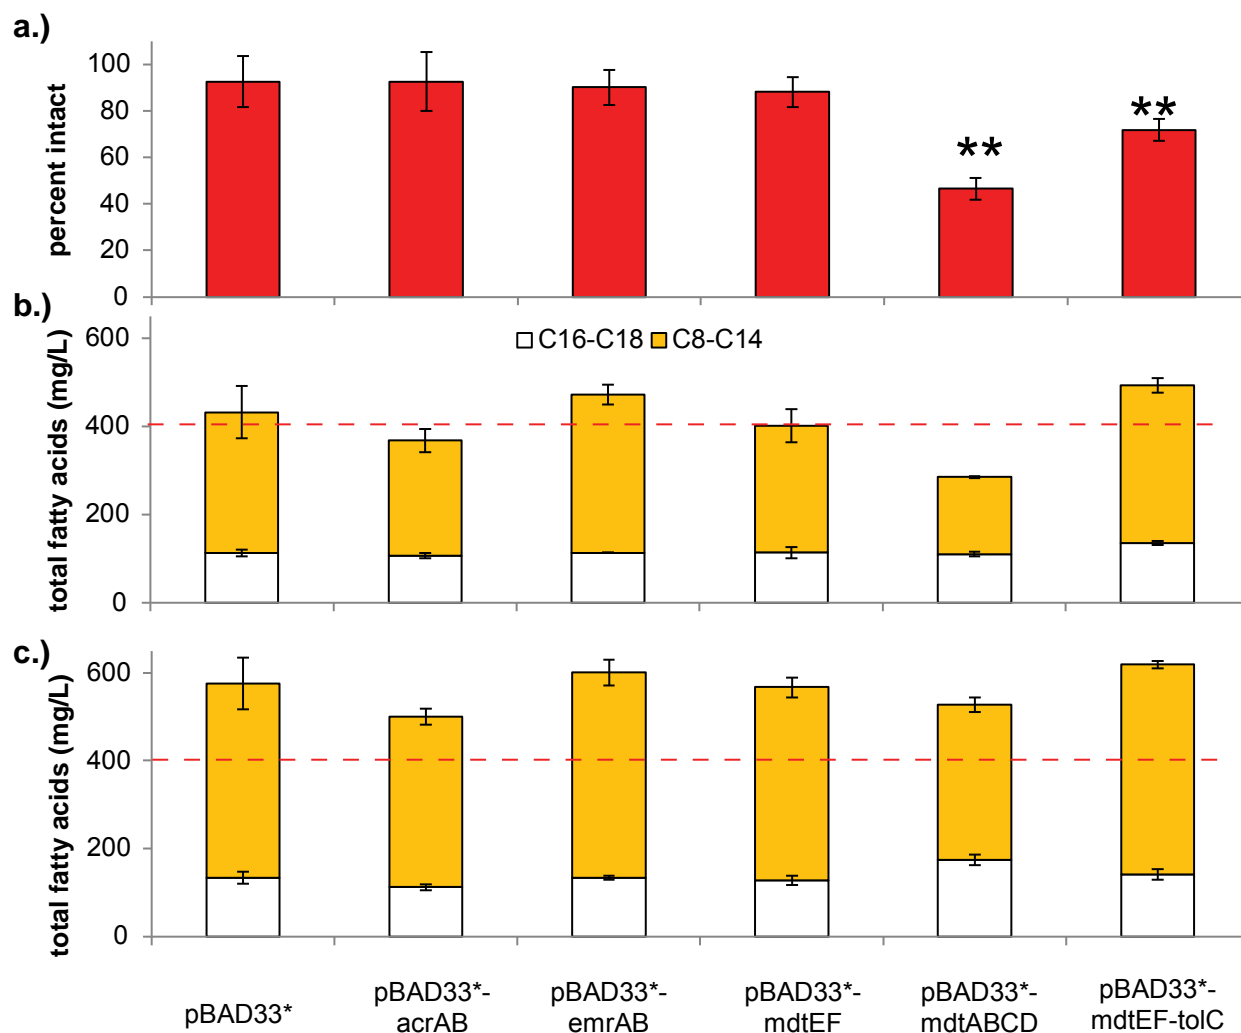

**Figure S8: Analysis of *E. coli* TY05ara expressing selected efflux pumps on multicopy plasmids.** Cultures of TY05ara harboring either empty vector pBAD33\* or selected efflux pump genes cloned in pBAD33\* were grown in LB + 0.4% glycerol + 34  $\mu\text{g}/\text{mL}$  chloramphenicol + 0.5 mM each  $\text{MgSO}_4$  and  $\text{CaCl}_2$ . (a) Percent intact cells determined by SYTOX Green staining. (b)  $\text{C}_8\text{-C}_{14}$  and  $\text{C}_{16}\text{-C}_{18}$  fatty acid titers 8 h post-inoculation. (c) Fatty acid titers 24 h post-inoculation. No improvements were observed over the negative control strain TY05ara/pBAD33\*. Reduced  $\text{C}_8\text{-C}_{14}$  titers were evident from expression of MdtABCD from pBAD33\* after 8 h.

## Supplementary References:

1. **Baba, T., T. Ara, M. Hasegawa, Y. Takai, Y. Okumura, M. Baba, K. A. Datsenko, M. Tomita, B. L. Wanner, and H. Mori.** 2006. Construction of *Escherichia coli* K-12 in-frame, single-gene knockout mutants: the Keio collection. *Mol Syst Biol* **2**:2006 0008.
2. **Datsenko, K. A., and B. L. Wanner.** 2000. One-step inactivation of chromosomal genes in *Escherichia coli* K-12 using PCR products. *Proc Natl Acad Sci U S A* **97**:6640-6645.
3. **Guzman, L. M., D. Belin, M. J. Carson, and J. Beckwith.** 1995. Tight regulation, modulation, and high-level expression by vectors containing the arabinose P<sub>BAD</sub> promoter. *J Bacteriol* **177**:4121-4130.
4. **Khlebnikov, A., K. A. Datsenko, T. Skaug, B. L. Wanner, and J. D. Keasling.** 2001. Homogeneous expression of the P<sub>BAD</sub> promoter in *Escherichia coli* by constitutive expression of the low-affinity high-capacity AraE transporter. *Microbiology* **147**:3241-3247.
5. **Lennen, R. M., M. A. Kruziki, K. Kumar, R. A. Zinkel, K. E. Burnum, M. S. Lipton, S. W. Hoover, D. R. Ranatunga, T. M. Wittkopp, W. D. Marner, 2nd, and B. F. Pfeleger.** 2011. Membrane Stresses Induced by Endogenous Free Fatty Acid Overproduction in *Escherichia coli*. *Appl Environ Microbiol* **77**:8114-8128.
6. **Nishino, K., and A. Yamaguchi.** 2001. Analysis of a complete library of putative drug transporter genes in *Escherichia coli*. *J Bacteriol* **183**:5803-5812.
7. **Sulavik, M. C., C. Houseweart, C. Cramer, N. Jiwani, N. Murgolo, J. Greene, B. DiDomenico, K. J. Shaw, G. H. Miller, R. Hare, and G. Shimer.** 2001. Antibiotic susceptibility profiles of *Escherichia coli* strains lacking multidrug efflux pump genes. *Antimicrob Agents Chemother* **45**:1126-1136.
8. **Thomason, L., D. L. Court, M. Bubunencko, N. Costantino, H. Wilson, S. Datta, and A. Oppenheim.** 2007. Recombineering: genetic engineering in bacteria using homologous recombination. *Curr Protoc Mol Biol* **Chapter 1**:Unit 1 16.
9. **Youngquist, J. T., R. M. Lennen, D. R. Ranatunga, W. H. Bothfeld, W. D. Marner, 2nd, and B. F. Pfeleger.** 2012. Kinetic modeling of free fatty acid production in *Escherichia coli* based on continuous cultivation of a plasmid free strain. *Biotechnol Bioeng* **109**:1518-1527.
